# Supplementary material for: Effect of N-Feruloylserotonin and Methotrexate on Severity of Experimental Arthritis and on Messenger RNA Expression of Key Proinflammatory Markers in Liver
Source: PubMed Central journal article supplement (PMC4983360; doi:10.1155/2016/7509653), 2016-07-31

**Supplementary data:**

**Figure S1 Simplified overview of prominent pathways proposed to be involved in the transcription regulation of TNF $\alpha$ , iNOS and IL-1 $\beta$  in rheumatoid arthritis with the suggested effect of N-f-5HT.** Binding of pro-inflammatory cytokines IL-1 $\beta$  and TNF- $\alpha$  to their respective competent receptors on target cells, IL1R1 and TNFR1, activate NF- $\kappa$ B and MAPKs pathways. MAPKs are regulated by several upstream phosphorylation cascades. Major MAPK families involved in the response to pro-inflammatory signals are the c-JUN *N*-terminal kinases (JNKs), ERK1/2 and the p38 enzymes. Similarly, binding of IL-6 or IFN- $\gamma$  is activating the JAK-STAT pathway. Activated transcription factors: NF- $\kappa$ B for NF- $\kappa$ B pathway, AP-1 for MAPKs and STAT1 or STAT3 for JAK-STAT pathway translocate from the cytoplasm into the nucleus, where they bind to the promoters of responsive genes coding for various cytokines (including TNF- $\alpha$  and IL-1 $\beta$ ) and other inflammatory molecules to activate the transcription. The mRNA expression of TNF- $\alpha$  is proposed to be mostly under control of NF- $\kappa$ B and AP-1, the expression of iNOS under control of NF- $\kappa$ B and STAT1, and the expression of IL-1 $\beta$  under control of NF- $\kappa$ B, AP-1 and STAT3. MTX is blocking the binding of IL-1 $\beta$  to IL1R. Both MTX and N-f-5HT have the potential to suppress NF- $\kappa$ B activation, MTX by well characterized mechanism of inhibition of I $\kappa$ B phosphorylation and subsequent release from the NF- $\kappa$ B complex. Both MTX and N-f-5HT inhibit the transcription of TNF- $\alpha$  and iNOS. In addition, N-f-5HT attenuates the transcription of IL-1 $\beta$ , presumably through STAT inhibition.

IL, interleukin; TNF- $\alpha$ , tumor-necrosis factor  $\alpha$ ; IL1R, IL-1 $\beta$  receptor; TNFR1, TNF- $\alpha$  receptor; NF- $\kappa$ B, nuclear factor-  $\kappa$ B; MAPK, mitogen-activated protein kinase; ERK1/2, extracellular signal-regulated kinases; IFN- $\gamma$ , interferon gamma; AP-1, activator protein-1; JAK, Janus kinase; STAT, signal transducers and activators of transcription; mRNA, messenger RNA; iNOS, inducible NO synthase; P, phosphorylation; N-f-5HT, N-feruloylserotonin; MTX, methotrexate; I $\kappa$ B, inhibitor of NF- $\kappa$ B.

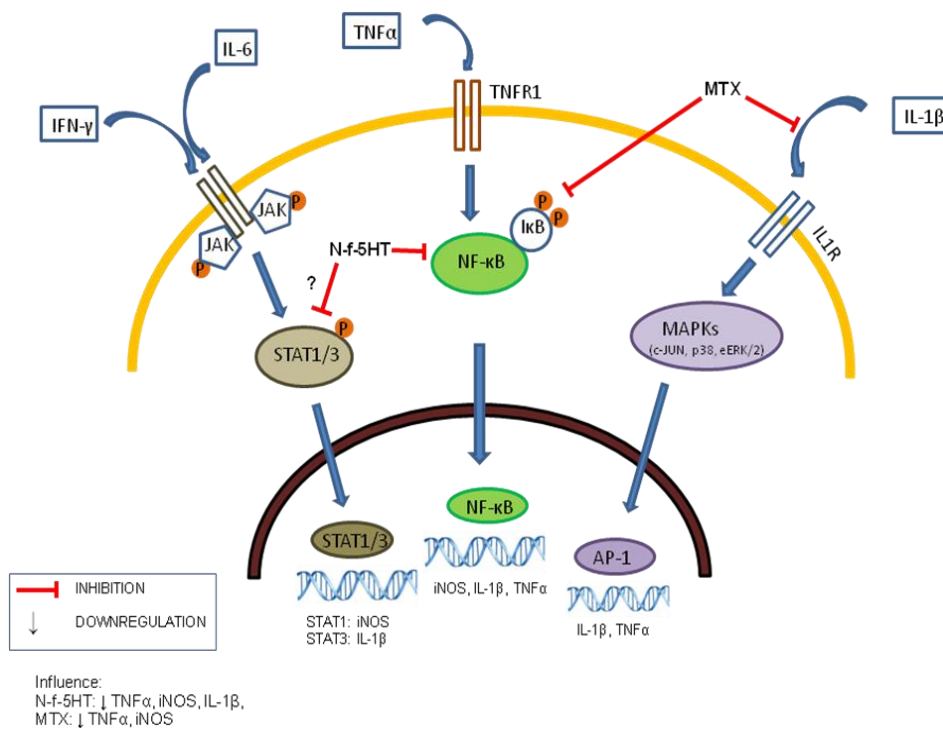

Supplement: 7509653.f1.pdf [file 7509653.f1.pdf]
